# Supplementary material
Source: publisher figshare collection journal article supplement (https://acs.figshare.com/ndownloader/files/3729430)
Supplement: Supplementary file 1 [file 3729430]

# Nanotube Electromechanics Beyond Carbon:

## The Case of WS<sub>2</sub>

*Roi Levi<sup>‡,†</sup>; Jonathan Garel,<sup>‡,†</sup>; David Teich<sup>§</sup>; Gotthard Seifert<sup>§</sup>; Reshef Tenne<sup>‡</sup>;  
Ernesto Joselevich<sup>‡,\*</sup>*

<sup>‡</sup>Department of Materials and Interfaces, Weizmann Institute of Science, Israel

<sup>§</sup>Theoretische Chemie, Technische Universität Dresden, Germany

## Supporting Information

**WS<sub>2</sub> NT synthesis.** The growth mechanisms of WS<sub>2</sub> nanotubes (NT) can be divided into two: outside-in sulfurization (OS) of long suboxide (W<sub>18</sub>O<sub>49</sub>) nanowhiskers,<sup>1</sup> or a vapor-solid (VS) growth of an incipient WS<sub>2</sub> NT, where a volatile tungsten oxide phase is continuously sulfurized at the tip of the INT by H<sub>2</sub>S gas.<sup>2</sup> The WS<sub>2</sub> NTs used here, were synthesized using the commonly used outside-in sulfurization method, similar to that used for the INT detailed in the FET research,<sup>3</sup> were synthesized by Nanomaterials Inc.<sup>4</sup> Here WO<sub>3-x</sub> nanoparticles elongate under reducing atmosphere (1%H<sub>2</sub>/99%N<sub>2</sub>) to tungsten suboxide nanowhiskers which are subsequently converted to WS<sub>2</sub> NTs by sulfurizing the needlelike WO<sub>3-x</sub> precursors.<sup>2, 5-7</sup> The INT empty core is the result of the difference between the oxide and sulfide densities.

These mechanisms produce WS<sub>2</sub> NTs with distinct structural differences. The VS WS<sub>2</sub> NTs are perfectly cylindrical, crystalline, open ended, slender (length~2-500 μm, diameter~15–20nm) with the most distinctive feature being the thin walls (5–8 layers) and the large hollow core (up to 70 vol%). The OS WS<sub>2</sub> NTs exhibit diameters of 40-250 nm with numerous shells and are almost exclusively capped at one of their ends and in some cases capped on both ends.

## AFM cantilever response during measurement

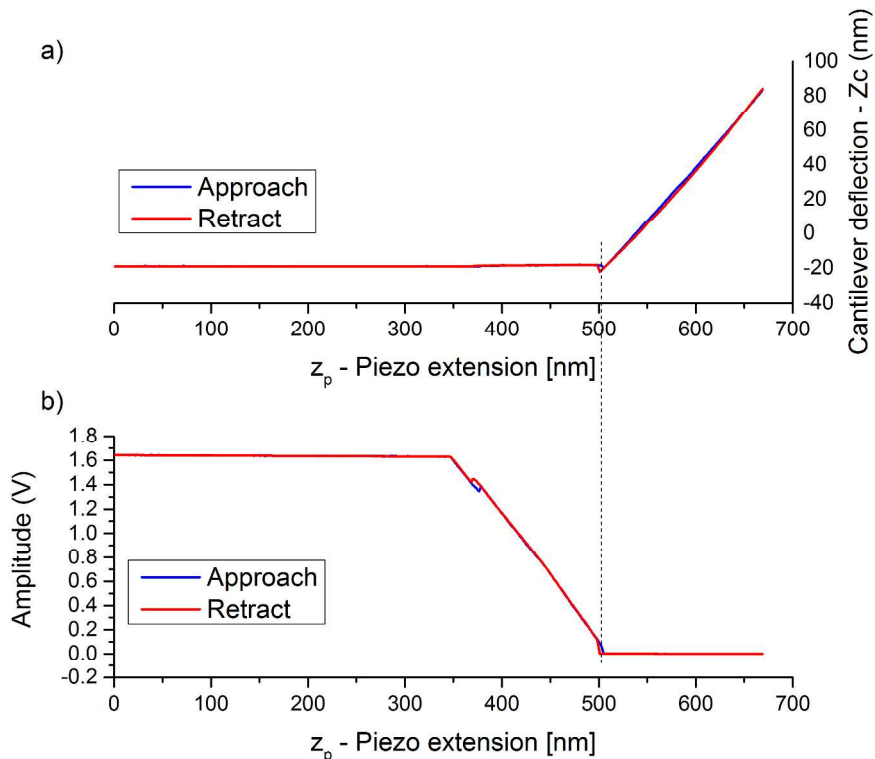

**Figure S1.** a) AFM tip oscillation amplitude and b) Force-distance (cantilever deflection) measurements recorded upon pressing on the pedal (right). The contact point is indicated by the tapping amplitude reaches zero (dashed line). The tapping mode deflection then increases linearly, corresponding to cantilever deformation indicated by the linear slope. The yielding of the pedal to the force results in a decreased cantilever deformation and therefore a smaller slope.

**Mechanical properties.** The mechanical properties of 17 WS<sub>2</sub> nanotubes (NT), specifically the torsional spring constant  $\kappa$  and the shear modulus  $G$ , were obtained from these measurements (Table S1). Here the first is the property of the torsional device, the second is an extrinsic property of the inorganic NT (INT) and the third is an intrinsic property of the INT torsional stiffness. The WS<sub>2</sub> NT was twisted by pressing the pedal at a series of points along the long axis of the pedal with an atomic force microscope (AFM) tip. Care was taken to maintain low torsion angles ( $< 20^\circ$ ), so as to avoid elastic to plastic transition, which may arise at high torsion angles. Additional care was taken by fabricating pedals with dimensions and materials identical to those

used in previous studies. These aforementioned pedals were studied in order to rule out possible artifacts arising from pedal deformation,<sup>8</sup> thus ensuring that the measured properties are those pertaining to the WS<sub>2</sub> NT itself.

For each point,  $K$  is calculated from eq. 1, where  $k_c$  is the spring constant of the cantilever,  $z_p$  is the Z-axis piezo extension, and  $z_c$  is the Z-axis cantilever deflection of the cantilever (see Fig. 1d).<sup>9, 10</sup>

$$K = k_c z_c / (z_p - z_c) \quad (1)$$

$K$  is plotted against the position ( $x$ ) along the pedal (see Fig. 1d), and fitted to Eq. 2, a modified leverage equation allowing for axis displacement (see Fig. 1d) where  $x-a$  is the lever arm,  $a$  is the pedal center location and  $K_B$  is the WS<sub>2</sub> NT bending spring constant, the latter two and the torsional spring constant  $\kappa$  being left as floating parameters.<sup>10</sup>

$$K = [(x - a)^2 / 2\kappa + K_b^{-1}]^{-1} \quad (2)$$

Using this method allows for the separation of the lever-arm dependent and independent components such as twisting as opposed to bending and slack, respectively.

The shear modulus  $G$ , is calculated using classical elasticity theory for a cylinder under torsion (eq. 7) where  $L$  is the length of the suspended segments of the WS<sub>2</sub> NT, and  $r_{in}$  and  $r_{out}$  are the inner and outer radii of the cylinder, respectively.<sup>10, 11</sup>

$$F_z = k_{\text{cantilever}} \cdot z_{\text{cantilever}} = k_{\text{INT,bend}} \cdot h_{\text{pedal,bend}} \quad (3)$$

$$\tau = F_z \cdot x = \kappa_{\text{INT}} \cdot \phi \quad (4)$$

$$z_{\text{piezo}} = z_{\text{cantilever}} + h_{\text{pedal,bend}} + h_{\text{pedal,twist}} \quad (5)$$

$$\phi = \tan^{-1}[(z_{\text{piezo}} - z_{\text{cantilever}} - h_{\text{pedal,bend}})/x] \quad (6)$$

$$G = 2\kappa L / [\pi(r_{\text{out}}^4 - r_{\text{in}}^4)] \quad (7)$$

Here the inner radii is a function of  $n$ , the number of mechanically coupled layers twisting together,<sup>12</sup> and thus a measure of the WS<sub>2</sub> NT inter-layer mechanical coupling. At the extreme values of  $n$ , the INT is treated as a solid rod ( $G_s$ ) or a single layer INT ( $G_h$ ). Thus for the first case Eq. 7 is reduced to Eq. 8 or to Eq. 9 for the second when using the interlayer spacing for WS<sub>2</sub>, 6.2Å.<sup>13</sup>

$$G_r = 2\kappa L / (\pi r_{\text{out}}^4) \quad (8)$$

$$G_l = 2\kappa L / (4\pi r_{\text{out}}^3 \delta r) \quad (9)$$

It is possible to consider the moderate case where it is treated as a hollow-core cylinder where the inner radius is taken to be half of the outer.<sup>3</sup> However as the fourth power on the radii results in a change of 6% only and within experimental error this case does not give any additional information. Finally, it is possible to use the shear modulus ( $G_c \approx 80\text{GPa}$ ) from DFTB calculations,<sup>14</sup> Young's modulus measurements and mechanical measurements on WS<sub>2</sub> NTs synthesized by other techniques such as VS WS<sub>2</sub> NTs.<sup>12, 14</sup> In cases where  $G_s < 80\text{GPa}$  this facilitates a reverse estimation of  $n$  (Table S1).

**Table S1.** WS<sub>2</sub> NT torsional mechanical properties.<sup>1</sup>

| Device | Outer Diameter | Length | Torsional spring constant | Effective shear modulus |              | Mechanically coupled layers |
|--------|----------------|--------|---------------------------|-------------------------|--------------|-----------------------------|
|        |                |        |                           | Solid rod               | Single Layer |                             |
| #      | $d$            | $L$    | $\kappa$                  | $G_s$                   | $G_h$        | $n$                         |
|        | [nm]           | [nm]   | [N*m*10 <sup>15</sup> ]   | [GPa]                   |              |                             |
| 1      | 30.7±3.2       | 330±10 | 10.3±0.5                  | 39.5±11.9               | 243.8±55.5   | 3.9±2.7                     |
| 2      | 34.8±2.2       | 320±10 | 27.7±1.4                  | 51.5±6.6                | 376.9±38.9   | 6.7±1.6                     |
| 3      | 37±0.9         | 310±10 | 32.9±1.5                  | 56.7±5.2                | 423.3±32.3   | 7.9±1.4                     |
| 4      | 39.8±0.3       | 320±10 | 42.6±1.3                  | 55.3±2.4                | 443.7±18.7   | 8.2±0.6                     |
| 5      | 40.2±3.2       | 260±10 | 15.4±0.4                  | 12±0.6                  | 103.7±4.7    | 1.4±0.7                     |
| 6      | 46.7±1.7       | 420±10 | 109.8±4.2                 | 99.6±11.2               | 935.7±83.3   |                             |
| 7      | 48.2±19        | 320±10 | 25.2±1.9                  | 4.7±0.4                 | 61.3±4.8     | 0.8±0.2                     |
| 8      | 49.3±4.8       | 300±10 | 43.9±1.7                  | 31.5±2                  | 312.6±17.3   | 4.7±0.7                     |
| 9      | 49.2±8.9       | 410±10 | 64±1.7                    | 24.2±3.3                | 259.6±27.2   | 3.7±1.9                     |
| 10     | 53.1±16.7      | 140±10 | 146.1±13.7                | 10±1.5                  | 135.3±17.9   | 1.8±1.9                     |
| 11     | 55.2±1.5       | 420±10 | 254±15                    | 117±11.3                | 1302.3±108.4 |                             |
| 12     | 58.3±1.3       | 290±10 | 92±8.3                    | 23.2±2.7                | 273.3±29.1   | 3.9±1.2                     |
| 13     | 59.7±4         | 320±10 | 201±6.2                   | 40.8±1.6                | 519.2±20.1   | 8.3±0.5                     |
| 14     | 65.9±1.4       | 390±10 | 87.4±7.7                  | 18.5±2                  | 245.7±24.8   | 3.4±1.1                     |
| 15     | 67.8±3.4       | 430±10 | 115.8±6.8                 | 23.7±3.8                | 324.3±41.4   | 4.6±2.7                     |
| 16     | 89±2.6         | 400±10 | 328.3±14.3                | 22.3±2.2                | 395.7±32     | 5.6±2.1                     |
| 17     | 127.1±1.8      | 470±10 | 328.5±35                  | 6±0.7                   | 154.8±17.3   | 2±1.4                       |

<sup>1</sup> L: suspended length. The error for  $d$  is the standard deviation of 4 measurements performed along the WS<sub>2</sub> NT length while the error for L is derived from the AFM topography resolution. The error for all other values is derived from the previous errors. Devices 11 and 15 are depicted in Fig 1e and 1f, respectively.

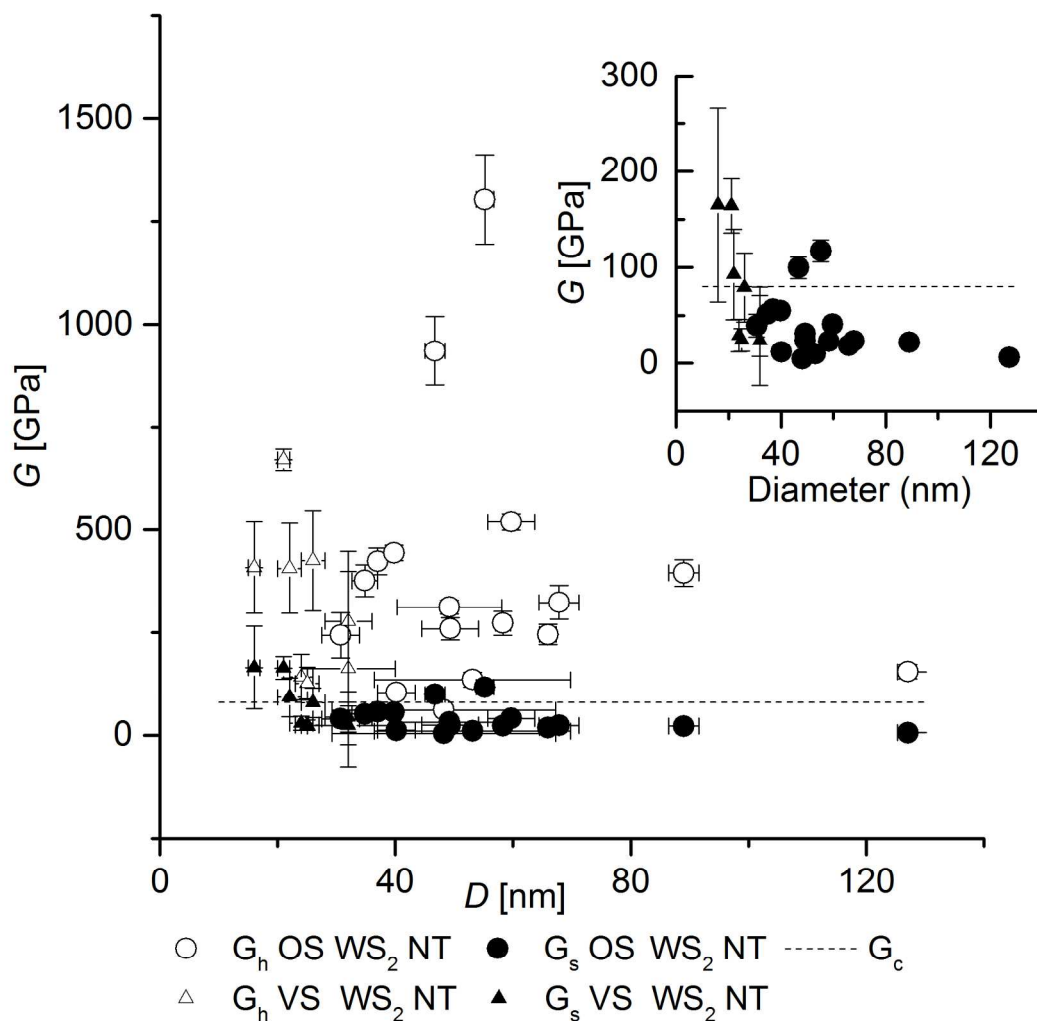

**Figure S2.** The effective shear modulus as a function of the nanotube diameter for OS  $\text{WS}_2$  NTs and VS  $\text{WS}_2$  NTs (circles and triangles, respectively) synthesized by different techniques. The effective shear moduli are calculated assuming either negligible or infinite inter-layer coupling, *i.e.* “hollow cylinder” ( $G_h$ ) and “solid rod” ( $G_s$ ) cases (hollow and full markers, respectively). The expected intra-layer shear modulus calculated by DFTB ( $G_c$ ) is shown as a reference.<sup>12</sup> Inset – close-up of the solid rod case values. The horizontal and vertical error bars correspond to the standard deviation of the experimental data.

Fig. S2 plots the shear moduli data against the OS WS<sub>2</sub> NT diameter for the devices measured here, the VS WS<sub>2</sub> NTs synthesized by a different synthetic technique,<sup>12</sup> and the theoretical value marked by a dotted line.<sup>14</sup> These results show that over the entire diameter range  $G_h$ , which is calculated using a single layer case, is significantly larger than the theoretical value  $G_c$ . This indicates that a significant number of layers are twisting together. This observation is in agreement with the experimental results for VS-WS<sub>2</sub> NTs as well as the theoretical work on VS WS<sub>2</sub> NTs where it was shown that for small angles all the layers twist together. Additionally, it can be seen that for both types of WS<sub>2</sub> NTs, experimental  $G_s$  values larger than  $G_c$  are observed, indicating that  $G_{th}$  is possibly underestimated. Finally, the torsional spring constant  $\kappa$  values obtained here are up to an order of magnitude higher than BNNT,<sup>8</sup> and two orders of magnitude larger than CNT, indicating that WS<sub>2</sub> NTs possess quite a high torsional stiffness.

Comparing these results to those obtained for VS WS<sub>2</sub> NTs shows a similar trend,<sup>12</sup> albeit at higher values. Interestingly, a similar effect was observed in the telescopic shear of WS<sub>2</sub> NTs where nanotubes synthesized by outside-in sulfurization exhibited a larger degree of inter-layer mechanical coupling when compared to VS WS<sub>2</sub> NTs.<sup>15</sup> This is in line with the promising performance of WS<sub>2</sub> NTs in nanocomposites and further highlights the possible use of the WS<sub>2</sub> NTs in NEMS.

**Electromechanical properties.** After the WS<sub>2</sub> NTs were characterized mechanically they were connected to an AC voltage of 0.1 V with a DC bias of 5V (see section 2.3). However due to technical issues only 6 of the 17 devices were available for electromechanical measurements. Of these, 5 out of the 6 showed a consistent electromechanical response to torsion (see Fig. S3). Two devices were subjected to bending and both showed a consistent electromechanical



response. Due to the measuring equipment generating electrical noise the results presented in table S2 were obtained by averaging a large number of measurements.

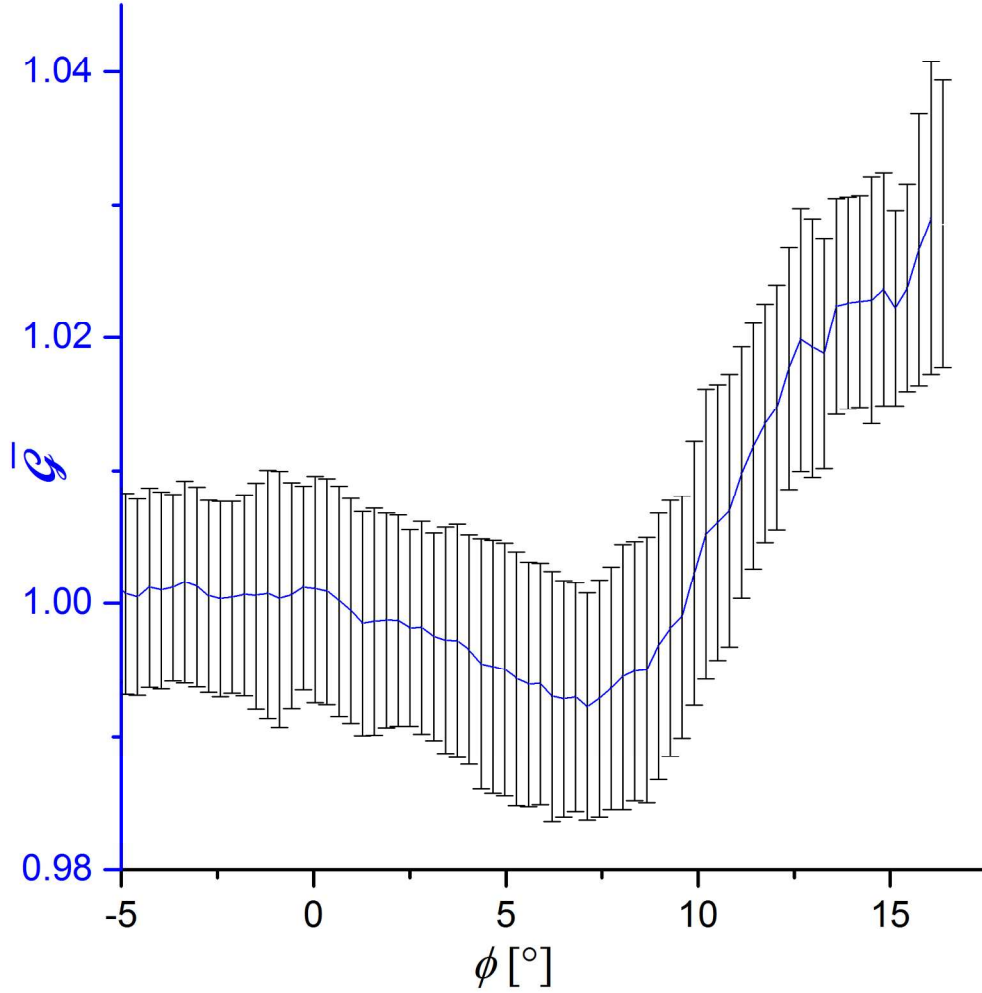

**Figure S3.** Repeatability of the electromechanical response with over 250 repeat twists of a WS<sub>2</sub> NT. The blue line shows the average value and the black lines denote the standard deviation of the average.

From this data two values are extracted –  $(\bar{G}_{\text{measured, strain}})_{\text{max}}$  for bending or as  $(\bar{G}_{\text{measured, strain}}/\phi)_{\text{max}}$  for torsion where  $\phi$  is the torsion angle in radians.  $(\bar{G}_{\text{measured, strain}})_{\text{max}}$  is calculated for the highest overall change, while

$(\bar{g}_{\text{measured, strain}}/\phi)_{\text{max}}$  yields the maximum sensitivity of the signal at a given angle within the rise region.

**Table S2.** WS<sub>2</sub> NT mechanical and electromechanical properties under torsion and/or tension.<sup>2</sup>

| #  | $d$       | $G_s$     | $G_h$        | $\left(\bar{g}_{\text{measured, strain}}/\phi\right)_{\text{max}}$ | $\left(\bar{g}_{\text{measured, strain}}\right)_{\text{max}}$ |
|----|-----------|-----------|--------------|--------------------------------------------------------------------|---------------------------------------------------------------|
|    | [nm]      | [GPa]     |              | [%*rad <sup>-1</sup> ]                                             | [%]                                                           |
| 1  | 30.7±3.2  | 39.5±11.9 | 243.8±55.5   |                                                                    |                                                               |
| 2  | 34.8±2.2  | 51.5±6.6  | 376.9±38.9   |                                                                    |                                                               |
| 3  | 37±0.9    | 56.7±5.2  | 423.3±32.3   |                                                                    |                                                               |
| 4  | 39.8±0.3  | 55.3±2.4  | 443.7±18.7   |                                                                    |                                                               |
| 5  | 40.2±3.2  | 12±0.6    | 103.7±4.7    | 14%                                                                | 30%                                                           |
| 6  | 46.7±1.7  | 99.6±11.2 | 935.7±83.3   | 145%                                                               |                                                               |
| 7  | 48.2±19   | 4.7±0.4   | 61.3±4.8     |                                                                    |                                                               |
| 8  | 49.3±4.8  | 31.5±2    | 312.6±17.3   |                                                                    |                                                               |
| 9  | 49.2±8.9  | 24.2±3.3  | 259.6±27.2   | 3%                                                                 |                                                               |
| 10 | 53.1±16.7 | 10±1.5    | 135.3±17.9   |                                                                    |                                                               |
| 11 | 55.2±1.5  | 117±11.3  | 1302.3±108.4 | 0%                                                                 |                                                               |
| 12 | 58.3±1.3  | 23.2±2.7  | 273.3±29.1   |                                                                    |                                                               |
| 13 | 59.7±4    | 40.8±1.6  | 519.2±20.1   |                                                                    |                                                               |
| 14 | 65.9±1.4  | 18.5±2    | 245.7±24.8   |                                                                    |                                                               |
| 15 | 67.8±3.4  | 23.7±3.8  | 324.3±41.4   | 8%                                                                 | 26.0%                                                         |
| 16 | 89±2.6    | 22.3±2.2  | 395.7±32     | 47%                                                                |                                                               |
| 17 | 127.1±1.8 | 6±0.7     | 154.8±17.3   |                                                                    |                                                               |

<sup>2</sup> The error for  $d$  is the standard deviation of 4 measurements performed along the WS<sub>2</sub> NT length while the error for all other values is derived from the previous errors. Device 15 was bent by pressing on the pedal above the NT center giving a similar behavior to device 5 (the pedal curvature in this section does not allow for extraction of the lever length).

It is interesting to note that both the number of responsive devices and the electromechanical response are quite high, particularly when compared to CNT (30-350% and 23.8%, respectively).

9, 16, 17

**Density-functional-tight-binding calculations.** The density-functional-tight-binding (DFTB) method is an approximate density-functional theory method.<sup>18, 19</sup> The single-particle Kohn-Sham eigenfunctions are expressed as a linear combination of localized atom-centered basis function, which are determined by self-consistent density-functional calculations on isolated atoms. The effective one-electron potential in the Kohn-Sham Hamiltonian is written as a superposition of atomic potentials, and only one- and two-center integrals are calculated to set up the Hamiltonian matrix. The calculations of the twisted nanotubes utilized helical boundary conditions<sup>20</sup>.

**Calculation of the strain – band gap relationships.** We start by several assumptions where  $n$  is the free charge carrier concentration based on the intrinsic semiconductor model,  $k_B$  is boltzmann's constant,  $T$  is the temperature in kelvin,  $\varepsilon$  is strain,  $\sigma$  is the uniaxial strain,  $\xi$  is the shear strain,  $Y$  is the measured young's modulus,<sup>14</sup>  $F_z$  is the vertical force and  $A_{cs}$  is the nanotube cross section calculated from  $d$  and assuming the inner radius is  $d/2$ .<sup>3</sup>

$$\mathcal{G} \propto n \quad (10)$$

More specifically that:

$$\mathcal{G} \propto n \propto \exp(-E_g/2k_B T) \quad (11)$$

As was demonstrated in article we may assume a linear  $\Delta E_g - \varepsilon$  relation:

$$\Delta E_g \propto \lambda \varepsilon \quad (12)$$

Thus assuming  $E_g$  alone is affected by  $\varepsilon$  as:

$$\bar{\mathcal{G}} = (\mathcal{G}_{\text{strain}}/\mathcal{G}_0) = \exp(-E_{g,\text{strain}}/2k_B T + E_{g,0}/2k_B T) = \exp(-\lambda \varepsilon/2k_B T) \quad (13)$$

We may then apply Eq. 13 to calculate  $\bar{\mathcal{G}}_{\text{estimated}}$  for three cases where we calculate the

contribution from torsion, tension and the combination of both ( $\bar{\mathcal{G}}_{\text{estimated, torsion}}$ ,  $\bar{\mathcal{G}}_{\text{estimated, tension}}$  and  $\bar{\mathcal{G}}_{\text{estimated, torsion\&tension}}$ , respectively).

$$\bar{\mathcal{G}}_{\text{estimated, torsion}} = \exp(-\lambda_{\xi}\xi/2k_{\text{B}}T) \quad (14)$$

$$\bar{\mathcal{G}}_{\text{estimated, tension}} = \exp(-\lambda_{\sigma}\sigma/2k_{\text{B}}T) \quad (15)$$

$$\bar{\mathcal{G}}_{\text{estimated, torsion\&tension}} = \exp(-(\lambda_{\xi}\xi + \lambda_{\sigma}\sigma)/2k_{\text{B}}T) \quad (16)$$

Where  $\sigma$  is calculated as:<sup>9</sup>

$$\sigma = 0.5(F_z/YA_{\text{cs}})^{2/3} \quad (17)$$

Using the torque  $\tau$  and the lever length  $x-a$  extracted from the measured data.

$$F_z = \tau \cdot (x - a) \quad (18)$$

A qualitative comparison between  $\bar{\mathcal{G}}_{\text{estimated, torsion\&tension}}$  and  $\bar{\mathcal{G}}_{\text{measured}}$  is made by normalizing  $\bar{\mathcal{G}}_{\text{estimated, torsion\&tension}}$  by a ratio  $A$  ( $A=5-10$ ) to put them both on the same scale

( $\bar{\mathcal{G}}_{\text{estimated, torsion\&tension}}^* = \bar{\mathcal{G}}_{\text{estimated, torsion\&tension}}/A$ ) as in Eq. 19-20.

$$A = (\Delta\bar{\mathcal{G}}_{\text{estimated, torsion\&tension}})_{\text{max}}/(\Delta\bar{\mathcal{G}}_{\text{measured}})_{\text{max}} \quad (19)$$

$$\bar{\mathcal{G}}_{\text{estimated, torsion\&tension}}^* = 1 + \Delta\bar{\mathcal{G}}_{\text{estimated, torsion\&tension}}/A \quad (20)$$

**Estimation of resistive elements in the WS<sub>2</sub> NTs torsional device setup.** The electrical model for the device may be described as in Fig. S4:

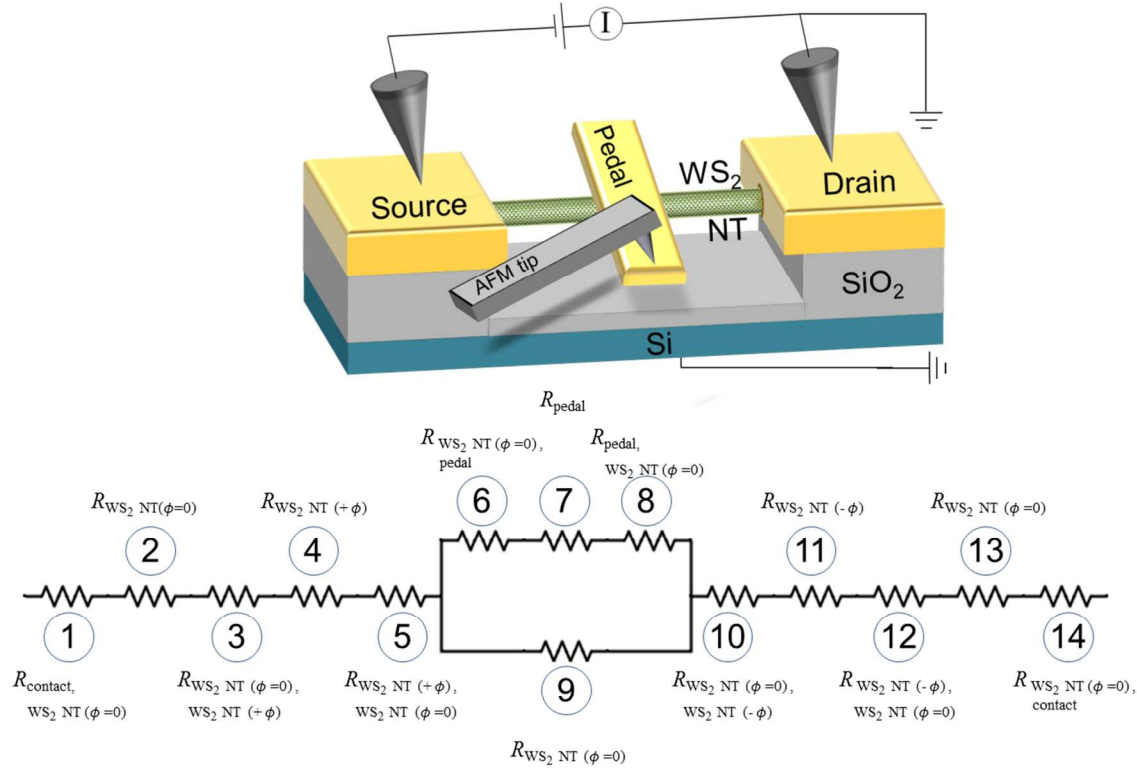

- ① - Contact resistance of untwisted WS<sub>2</sub> NT under the Cr\Au source electrode and the Cr\Au source electrode.
- ② - Resistance of untwisted WS<sub>2</sub> NT under the contact.
- ③ - Resistance between twisted and untwisted WS<sub>2</sub> NT sections.
- ④ - Resistance of twisted WS<sub>2</sub> NT section.
- ⑤ - Resistance between untwisted and twisted WS<sub>2</sub> NT sections.
- ⑥ - Contact resistance of untwisted WS<sub>2</sub> NT under the Cr\Au pedal and the Cr\Au pedal.
- ⑦ - Cr\Au pedal resistance.
- ⑧-⑭: Mirrored elements of - ⑥-①.

**Figure S4.** Schematic rendering of the separate resistive elements in the setup used for electromechanical measurements. a) Electromechanical measurement scheme. b) Electrical diagram of the resistive elements in the circuit.

Assuming that:

1. Twisting the INT produces a symmetric effect with respect to the twist direction. Thus the right-hand side resistors are equal to those on the left-hand side.
2. Previous 4-probe measurements are applicable here:<sup>3</sup>
  - 2.1.  $\textcircled{6} + \textcircled{7} + \textcircled{8} \gg \textcircled{9}$
  - 2.2.  $\textcircled{1} \gg \textcircled{2} + [(\textcircled{6} + \textcircled{7} + \textcircled{8})^{-1} + \textcircled{9}]^{-1}$
3. The slight differences in  $E_g$  ( $\sim 10$  meV) would not cause significant scattering. Thus,  $\textcircled{3}$ ,  $\textcircled{5} \rightarrow 0$ .

**Contact resistance and conductivity estimations.** Thus, the contact resistance would remain as the dominant resistive element which is independent of  $\phi$ . Furthermore, we then may assume that the discrepancy between the estimated and measured values is predominantly due to contact resistance ( $\textcircled{1}$  or  $R_c$ ) and calculate  $R_c$  based on this assumption.

Using Eq. 21 and 22 for the measured overall device resistance for the relaxed and twisted  $\text{WS}_2$  NT cases ( $R_0$  and  $R_\phi$ , respectively) may be expressed as:

$$R_0 = 2(R_c + R(\phi = 0)_{\text{WS}_2 \text{ NT}}) \quad (21)$$

$$R_\phi = 2(R_c + R(\phi)_{\text{WS}_2 \text{ NT}}) \quad (22)$$

We may express the measured relative conductance  $\bar{G}_{\text{measured}}$  as:

$$\bar{G}_{\text{measured}} = R_\phi^{-1} / R_0^{-1} = (R_c + R(\phi = 0)_{\text{WS}_2 \text{ NT}}) / (R_c + R(\phi)_{\text{WS}_2 \text{ NT}}) \quad (23)$$

The estimated relative conductance  $\bar{G}_{\text{estimated, torsion\&tension}}$  assumes  $R_c = 0$  and thus:

$$\bar{G}_{\text{estimated, torsion\&tension}} = R(\phi = 0)_{\text{WS}_2 \text{ NT}} / R(\phi)_{\text{WS}_2 \text{ NT}} \quad (24)$$

Finally, we may extract the contact resistance from:

$$2R_c = R_0 (\bar{G}_{\text{measured}}^{-1} - \bar{G}_{\text{estimated, torsion\&tension}}^{-1}) / (1 - \bar{G}_{\text{estimated, torsion\&tension}}^{-1}) \quad (25)$$

**Table S3.** WS<sub>2</sub> NT measured and estimated electromechanical properties.<sup>3</sup>

| #  | Deformation | $\bar{G}_{\text{estimated, torsion\&tension}}$ | $R_0$         | $\bar{G}_{\text{measured}}$ | $R_c$         | $R_c/R_{\text{WS}_2 \text{ NT}}$ |
|----|-------------|------------------------------------------------|---------------|-----------------------------|---------------|----------------------------------|
|    |             |                                                | [M $\Omega$ ] |                             | [M $\Omega$ ] |                                  |
| 5  | Twisting    | 1.65                                           | 800           | 1.08                        | 320           | 7                                |
|    | Bending     | 3.00                                           |               | 1.30                        | 260           | 6                                |
| 6  | Twisting    | 3.00                                           | 150           | 1.25                        | 53            | 7                                |
| 9  | Twisting    | 1.40                                           | 0.18          | 1.01                        | 0.088         | 65                               |
| 15 | Twisting    | 1.60                                           | 417           | 1.05                        | 180           | 11                               |
|    | Bending     | --                                             |               | 1.26                        | --            | --                               |
| 16 | Twisting    | 3.00                                           | 1.5           | 1.03                        | 0.72          | 64                               |

---

<sup>3</sup> Device 15 was bent by pressing on the pedal above the NT center giving a similar behavior to device 5 (the pedal curvature in this section does not allow for extraction of the lever length).

## Electromechanical response extrapolation

The extrapolated electromechanical response presented here is divided into the extrapolated electrical response to torsion and the extrapolated electrical response to tension. The extrapolation of the electrical response to tension is done by taking values of  $\sigma$  applied to VS WS<sub>2</sub> NTs without any damage.<sup>12</sup> The extrapolation of the electrical response to tension is done by taking values of  $\phi$  applied to OS WS<sub>2</sub> NTs in this work without any damage and extrapolating them to WS<sub>2</sub> NTs of larger diameters used in the FET research.<sup>3</sup> It should be noted that  $\bar{G}_{\text{estimated, torsion}}$  and  $\bar{G}_{\text{estimated, tension}}$  are not directly comparable in terms of strain values. For the sake of completion,  $\bar{G}_{\text{estimated, torsion}}$  as a function of the uniaxial strain (see Eq. 33 and the inset in Fig. S6a) shows a similar response to that of  $\bar{G}_{\text{estimated, tension}}$ .

$$\sigma = \sqrt{(\xi \cdot L)^2 + L^2}/L \quad (26)$$

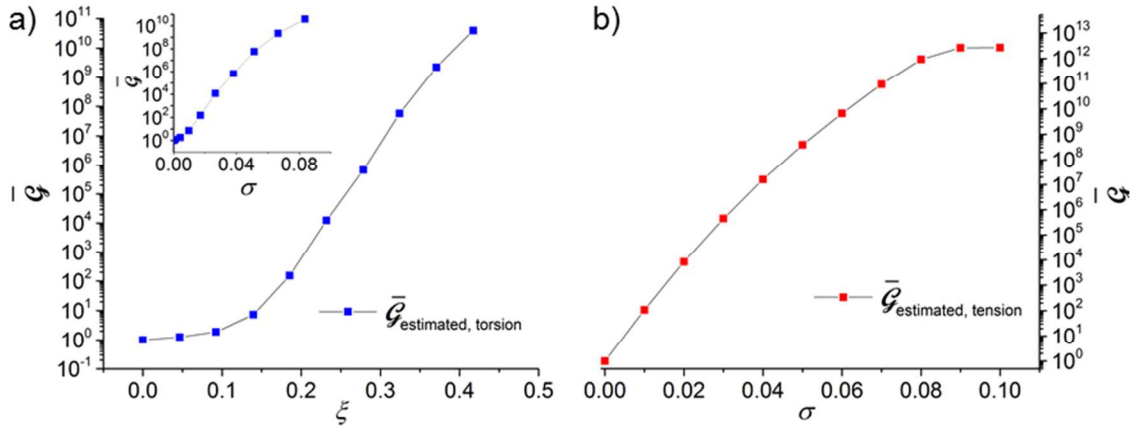

**Figure S5.** Extrapolation of the electrical response assuming no contact resistance to a) torsion and b) tension. The inset of a) shows  $\bar{G}_{\text{estimated, torsion}}$  as a function of the shear strain converted to uniaxial strain using Eq. 26 for the sake of comparison with b).



## References

1. Zak, A.; Sallacan-Ecker, L.; Margolin, A.; Feldman, Y.; Popovitz-Biro, R.; Albu-Yaron, A.; Genut, M.; Tenne, R. Scaling Up of the WS<sub>2</sub> Nanotubes Synthesis. *Fuller. Nanotub. Car. N.* **2011**, 19, 18-26.
2. Margolin, A.; Rosentsveig, R.; Albu-Yaron, A.; Popovitz-Biro, R.; Tenne, R. Study of the Growth Mechanism of WS<sub>2</sub> Nanotubes Produced by a Fluidized Bed Reactor. *J. Mater. Chem.* **2004**, 14, 617-624.
3. Levi, R.; Bitton, O.; Leitun, G.; Tenne, R.; Joselevich, E. Field-Effect Transistors Based on WS<sub>2</sub> Nanotubes with High Current-Carrying Capacity. *Nano Lett.* **2013**, 13, 3736-3741.
4. Zak, A.; Sallacan-Ecker, L.; Margolin, A.; Genut, M.; Tenne, R. Insight Into the Growth Mechanism of WS<sub>2</sub> Nanotubes in the Scaled-Up Fluidized-Bed Reactor. *Nano* **2009**, 4, 91-98.
5. Rothschild, A.; Frey, G. L.; Homyonfer, M.; Tenne, R.; Rappaport, M. Synthesis of bulk WS<sub>2</sub> nanotube phases. *Mater. Res. Innov.* **1999**, 3, 145-149.
6. Rothschild, A.; Sloan, J.; Tenne, R. Growth of WS<sub>2</sub> Nanotubes Phases. *J. Am. Chem. Soc.* **2000**, 122, 5169-5179.
7. Rothschild, A.; Popovitz-Biro, R.; Lourie, O.; Tenne, R. Morphology of Multiwall WS<sub>2</sub> Nanotubes. *J. Phys. Chem B* **2000**, 104, 8976-8981.
8. Garel, J.; Leven, I.; Zhi, C.; Nagapriya, K. S.; Popovitz-Biro, R.; Golberg, D.; Bando, Y.; Hod, O.; Joselevich, E. Ultrahigh Torsional Stiffness and Strength of Boron Nitride Nanotubes. *Nano Lett.* **2012**, 12, 6347-6352.

9. Cohen-Karni, T.; Segev, L.; Srur-Lavi, O.; Cohen, S. R.; Joselevich, E. Torsional Electromechanical Quantum Oscillations in Carbon Nanotubes. *Nat. Nanotechnol.* **2006**, 1, 36-41.
10. Jiang, H.; Yu, M. F.; Liu, B.; Huang, Y. Intrinsic Energy Loss Mechanisms in a Cantilevered Carbon Nanotube Beam Oscillator. *Phys. Rev. Lett.* **2004**, 93, 185501.
11. Celik-Aktas, A.; Zuo, J. M.; Stubbins, J. F.; Tang, C.; Bando, Y. Structure and Chirality Distribution of Multiwalled Boron Nitride Nanotubes. *Appl. Phys. Lett.* **2005**, 86, 133110.
12. Nagapriya, K. S.; Goldbart, O.; Kaplan-Ashiri, I.; Seifert, G.; Tenne, R.; Joselevich, E. Torsional Stick-Slip Behavior in WS<sub>2</sub> Nanotubes. *Phys. Rev. Lett.* **2008**, 101, 195501.
13. Friend, R. H.; Yoffe, A. D. Electronic Properties of Intercalation Complexes of the Transition Metal Dichalcogenides. *Adv. Phys.* **1987**, 36, 1 - 94.
14. Kaplan-Ashiri, I.; Cohen, S. R.; Gartsman, K.; Ivanovskaya, V.; Heine, T.; Seifert, G.; Wiesel, I.; Wagner, H. D.; Tenne, R. On the Mechanical Behavior of WS<sub>2</sub> Nanotubes Under Axial Tension and Compression. *Proc. Natl. Acad. Sci. U.S.A* **2006**, 103, 523-528.
15. Tang, D.-M.; Wei, X.; Wang, M.-S.; Kawamoto, N.; Bando, Y.; Zhi, C.; Mitome, M.; Zak, A.; Tenne, R.; Golberg, D. Revealing the Anomalous Tensile Properties of WS<sub>2</sub> Nanotubes by in Situ Transmission Electron Microscopy. *Nano Lett.* **2013**, 13, 1034-1040.
16. Hall, A. R.; Falvo, M. R.; Superfine, R.; Washburn, S. Electromechanical Response of Single-Walled Carbon Nanotubes to Torsional Strain in a Self-Contained Device. *Nat. Nanotechnol.* **2007**, 2, 413-416.
17. Sazonova, V.; Yaish, Y.; Ustunel, H.; Roundy, D.; Arias, T. A.; McEuen, P. L. A Tunable Carbon Nanotube Electromechanical Oscillator. *Nature* **2004**, 431, 284-287.

18. Seifert, G.; Porezag, D.; Frauenheim, T. Calculations of Molecules, Clusters, and Solids with a Simplified LCAO-DFT-LDA Scheme. *Int. J. Quant. Chem.* **1996**, 58, 185-192.
19. Seifert, G. Tight-Binding Density Functional Theory: An Approximate Kohn–Sham DFT Scheme†. *J. Phys. Chem A* **2007**, 111, 5609-5613.
20. Zhang, D.-B.; Hua, M.; Dumitrică, T. Stability of Polycrystalline and Wurtzite Si Nanowires via Symmetry-Adapted Tight-Binding Objective Molecular Dynamics. *J. Chem. Phys* **2008**, 128, 084104.
